# Supplementary material for: X-ray diffraction reveals the intrinsic difference in the physical properties of membrane and soluble proteins
Source: PubMed Central journal article supplement (PMC5717104; doi:10.1038/s41598-017-17216-1), 2017-12-05
Supplement: 41598_2017_17216_MOESM1_ESM.pdf [file 41598_2017_17216_MOESM1_ESM.pdf]

**Title: X-ray diffraction reveals the intrinsic difference in the physical properties of membrane and soluble proteins**

**Authors:** Xavier Robert<sup>1a</sup>, Josiane Kassis-Sahyoun<sup>1a</sup>, Nicoletta Ceres<sup>1a</sup>, Juliette Martin<sup>a</sup>, Michael R. Sawaya<sup>b</sup>, Randy J. Read<sup>c</sup>, Patrice Gouet<sup>a</sup>, Pierre Falson<sup>a</sup>, and Vincent Chaptal<sup>a\*</sup>

**Legends supplemental-information**

**Fig. S1:** comparison of anisotropy between soluble and membrane proteins. **a/** Calculation on amplitudes. Plot of all the entries on a scatter plot. Black bars show the average anisotropy of the sample and brackets display the 95% confidence interval of the population mean. Student's T-test with Welch correction (two-tailed p-value < 0.0001), and Mann-Whitney difference of medians (two-tailed p-value < 0.0001). **b/** Calculation on intensities. Plot of all the entries on a scatter plot. Black bars show the average anisotropy of the sample and brackets display the 95% confidence interval of the population mean. Student's T-test with Welch correction (two-tailed p-value < 0.0001), and Mann-Whitney difference of medians (two-tailed p-value < 0.0001). The probability distribution function of these two types of proteins can be fitted by a Weibull distribution :  $y = a*b*x^{(b-1)}*exp(-a*x^b)$  ;

|                   | On amplitudes (F)  | On Intensities (I) |
|-------------------|--------------------|--------------------|
| Soluble proteins  | a = 0.15 ; b= 0.83 | a = 0.05 ; b= 1.07 |
| Membrane proteins | a = 0.05 ; b= 0.93 | a = 0.02 ; b= 1.09 |

**Fig. S2:** comparison of crystal contacts between soluble and membrane proteins. **a/** Graph of anisotropy (calculated on amplitudes) as a function of crystal contact ratio for soluble (blue) and membrane proteins (red). Each dot represent an entry. The black dots represent the 95th percentile for each contact ratio bin, and has been fitted with a double exponential:  $y = a*exp(b*x)+c*exp(d*x)$

Soluble proteins:

Coefficients (with 95% confidence bounds):

$$a = 20.39 (17.13, 23.65)$$

$$b = -0.2679 (-0.4945, -0.04127)$$

$$c = 44.4 (40.61, 48.19)$$

$$d = -10.21 (-12.1, -8.327)$$

Membrane proteins:

Coefficients (with 95% confidence bounds):

$$a = 79.22 (59.35, 99.1)$$

$$b = -3.639 (-4.653, -2.626)$$

$$c = 19.61 (-7.676, 46.89)$$

$$d = -55.22 (-249.9, 139.4)$$

**b/** Scatter plot of soluble proteins in blue and membrane proteins in red, with black bars representing the mean of the sample and brackets displaying the 95% confidence interval of the population mean. Student's T-test with Welch correction (two-tailed p-value < 0.0001), and Mann-Whitney difference of medians (two-tailed p-value < 0.0001).

**Fig. S3:** comparison of solvent content between soluble and membrane proteins. **a/** Graph of anisotropy (calculated on amplitudes) as a function of solvent content for soluble (blue) and membrane proteins (red). Each dot represent an entry. The black dots represent the 95th percentile for each solvent content bin, and has been fitted with a Gaussian fit:  $y = a*exp(-((x-b)/c)^2)$ ;

Soluble proteins:

Coefficients (with 95% confidence bounds):

$$a = 64.06 (58.86, 69.27)$$

$$b = 85.56 (76.75, 94.37)$$

$$c = 44.24 (35.19, 53.28)$$

Membrane proteins:

Coefficients (with 95% confidence bounds):

$$a = 79.35 (71.89, 86.81)$$

$$b = 68.39 (66.56, 70.21)$$

$$c = 21.19 (18.44, 23.94)$$

**b/** Scatter plot of soluble proteins in blue and membrane proteins in red, with black bars representing the mean of the sample and brackets displaying the 95% confidence interval of the population mean. Student's T-test with Welch correction (two-tailed p-value < 0.0001), and Mann-Whitney difference of medians (two-tailed p-value < 0.0001).

**Fig. S4:** comparison of resolution between soluble and membrane proteins. **a/** Graph of anisotropy (calculated on amplitudes) as a function of resolution for soluble (blue) and membrane proteins (red). Each dot represent an entry. **b/** Scatter plot of soluble proteins in blue and membrane proteins in red, with black bars representing the mean of the sample and brackets displaying the 95% confidence interval of the population mean. Student's T-test with Welch correction (two-tailed p-value < 0.0001), and Mann-Whitney difference of medians (two-tailed p-value < 0.0001).

**Fig. S5:** Power-law fits of anisotropy as a function of resolution. **a/** The four panels display the fits on amplitudes shown in Fig. 2A for comparison. The red curves corresponding to membrane proteins are always above the soluble proteins (blue). **b/** fits calculated on intensities as in Fig. 2B. Bellow are equations defining the percentile-fits of anisotropy (calculated on amplitudes or intensities) as a function of resolution.

|                             | Soluble proteins                        |                                        | Membrane proteins                       |                                  |
|-----------------------------|-----------------------------------------|----------------------------------------|-----------------------------------------|----------------------------------|
|                             | AnisoB(F) =                             | AnisoB(I) =                            | AnisoB(F) =                             | AnisoB(I) =                      |
| 99 <sup>th</sup> percentile | $6.68 \times \text{Reso}^{2.22} + 4.28$ | $15.3 \times \text{Reso}^{1.71}$       | -                                       | -                                |
| 95 <sup>th</sup> percentile | $3.64 \times \text{Reso}^{2.46} + 3.84$ | $7.84 \times \text{Reso}^{1.93}$       | $5.07 \times \text{Reso}^{2.32} + 1.93$ | $8.63 \times \text{Reso}^{2.11}$ |
| 75 <sup>th</sup> percentile | $2.16 \times \text{Reso}^{2.40} + 1.39$ | $4.25 \times \text{Reso}^{2.07}$       | $2.95 \times \text{Reso}^{2.34}$        | $4.96 \times \text{Reso}^{2.16}$ |
| 50 <sup>th</sup> percentile | $0.94 \times \text{Reso}^{2.55} + 1.01$ | $2.4 \times \text{Reso}^{2.13} + 0.08$ | $1.57 \times \text{Reso}^{2.44} + 0.11$ | $2.89 \times \text{Reso}^{2.28}$ |
| 25 <sup>th</sup> percentile | $0.36 \times \text{Reso}^{2.45} + 0.42$ | $1.35 \times \text{Reso}^{2.03}$       | $1.32 \times \text{Reso}^{1.78}$        | $1.18 \times \text{Reso}^{2.62}$ |

**c/** Two types of membrane protein crystallization. Type I crystals: layers of membrane proteins stacked side by side, with hydrophobic surfaces providing crystals contacts, are stacked one on another; Type II crystals: detergent molecules shield hydrophobic regions of membrane proteins and crystal contacts involve only polar heads; The hydrophobic region of the protein is depicted here in green, and extra-membranous parts in orange. Fig. adapted from (24). **d/** Examples of proteins belonging to different classes of membrane proteins according to their insertion in the membrane. The proteins are depicted in blue cartoon representation, the membrane is shown in orange. All proteins are on the same scale. Alpha: Alpha-helical transmembrane proteins. GpA: Glycophorin A, *PDB code (2kpe)*; LacY: Lactose permease, *PDB code (2y5y)*; Atm1: *PDB code (4mrs)*; A2A receptor: Adenosine receptor, *PDB code (3pwh)*; Aqp0: Aquaporin 0, *PDB code (2z5x)*. Beta: Beta-barrel transmembrane proteins: OprM: Outer, *PDB code (3d5k)*; mVDAC-1: channel, *PDB code (3emn)*. Mono: Monotopic membrane proteins: MoaB: Monoamine oxidase B, *PDB code (1s3e)*; PGH2S1: Prostaglandine H2 synthase 1, *PDB code (1q4g)*.

**Fig. S6:** **a/** comparison of anisotropy as a function of insertion into the membrane. ANOVA of the three types of membrane proteins as defined by Stephen White's database. The three samples have been analyzed for samples of the same resolution range (2.5-3 Å) to avoid a bias due to the effect of resolution. No significant difference could be found using ANOVA or Kruskal-Wallis analysis. Average ALPHA = 22.75, BETA

= 24.01 and MONO = 17.27. **b/** Comparison of diffraction anisotropy between ATPases, Electron-transfer proteins, transporters, channels and receptors. The comparison has been conducted using the ANOVA with Tukey's post-Hoc analysis. The three samples have been analyzed with the same number of entries in each category, after randomization of the transporters, channels and receptors. No statistical differences have been observed. Means: ATPases = 22.06 Å<sup>2</sup>, E-transfer = 22.84 Å<sup>2</sup>, transporters = 25.51 Å<sup>2</sup>, channels = 24.62 Å<sup>2</sup>, receptors = 20.54 Å<sup>2</sup>. **c/** Influence of ligands on diffraction anisotropy of membrane protein crystals. The horizontal bar represents the mean and the brackets the 95% confidence interval of the mean. Student's T-test with Welch correction (two-tailed p-value = 0.0058), and Mann-Whitney difference of medians (two-tailed p-value = 0.037). **d/** Anisotropy of macromolecule crystals over the years. For each year, the average anisotropy is shown as a red horizontal bars; note that the scale (right) has been magnified to show more clearly the values.

Figure S1

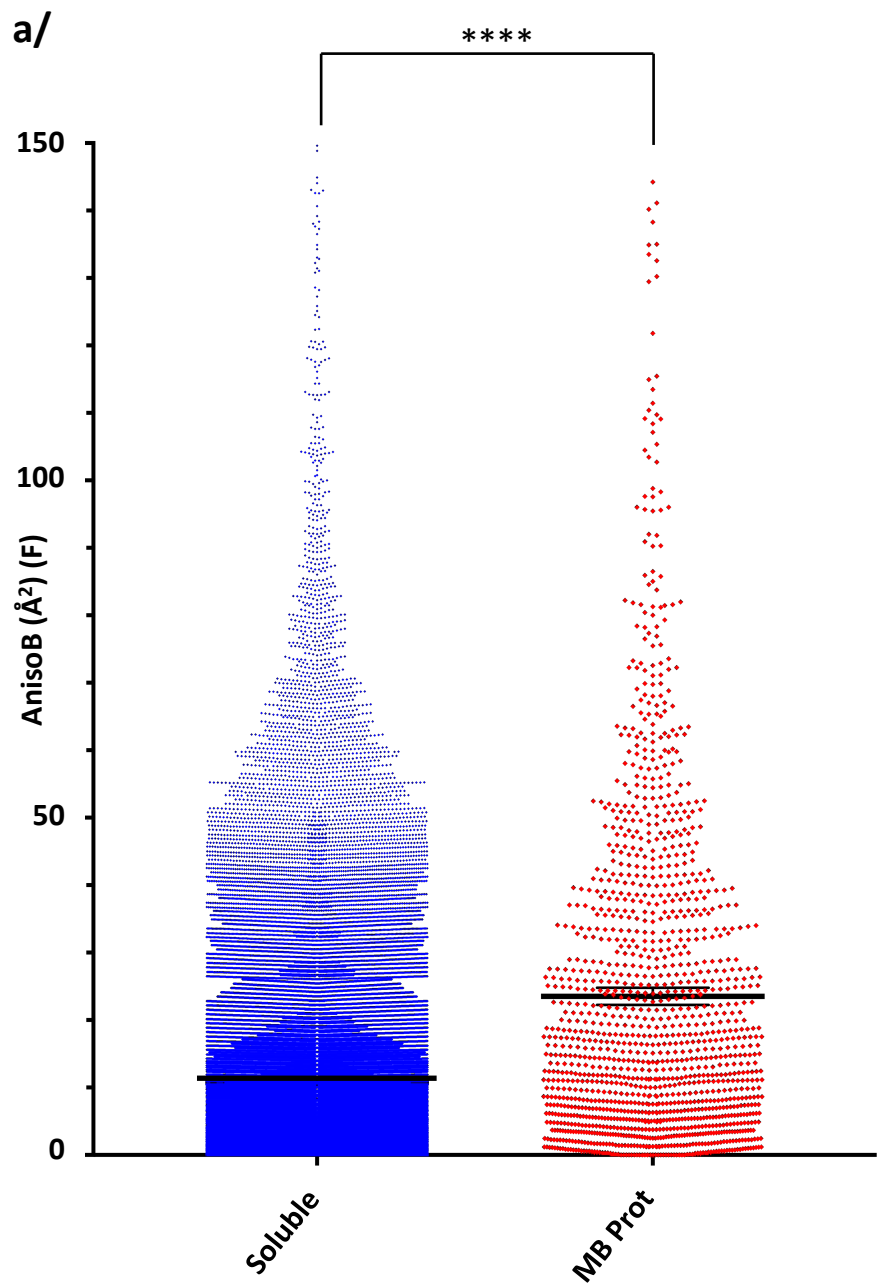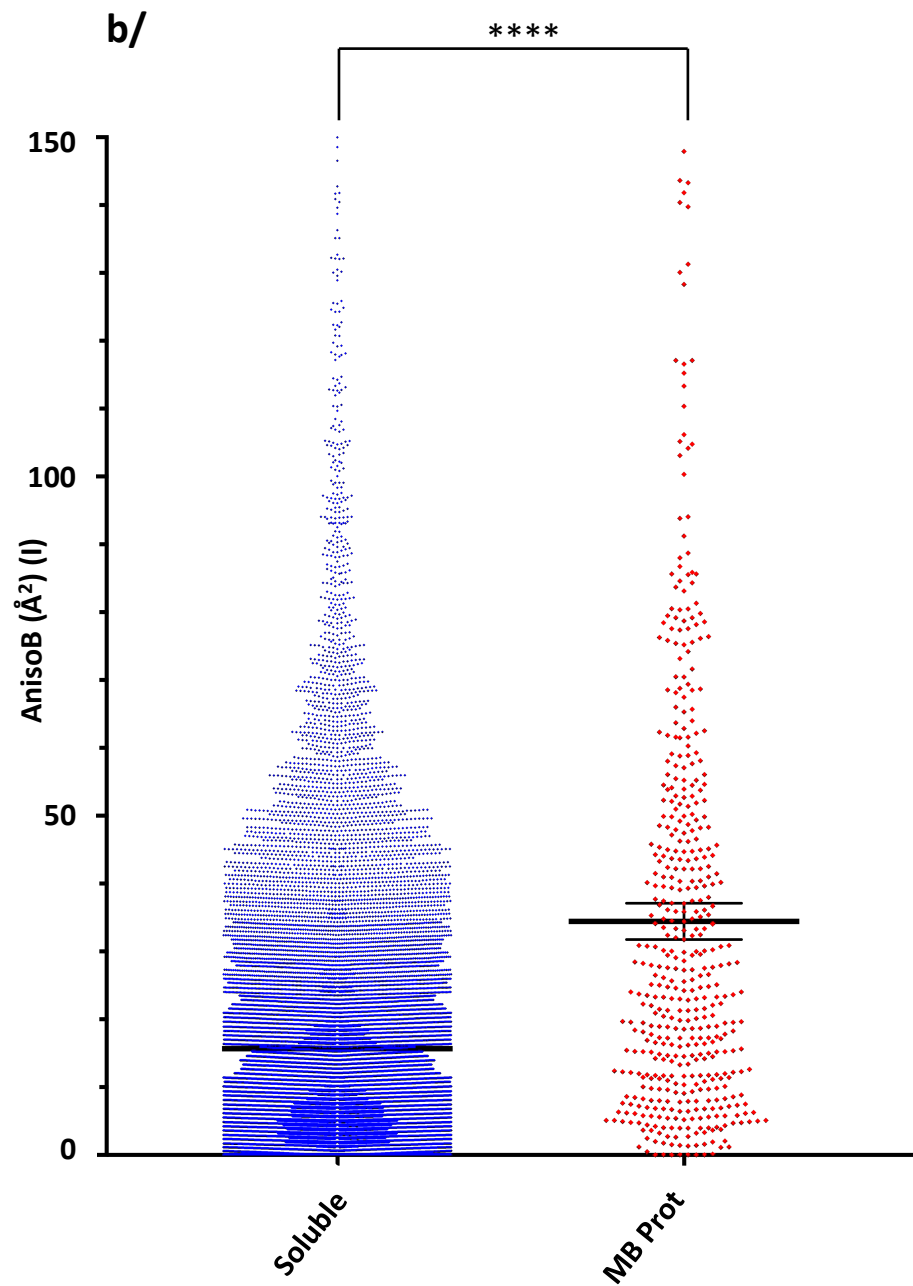

**Figure S2**

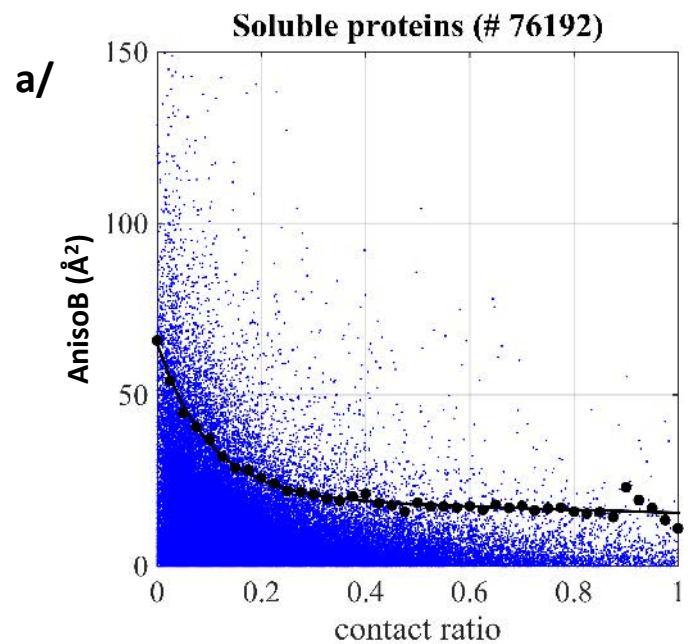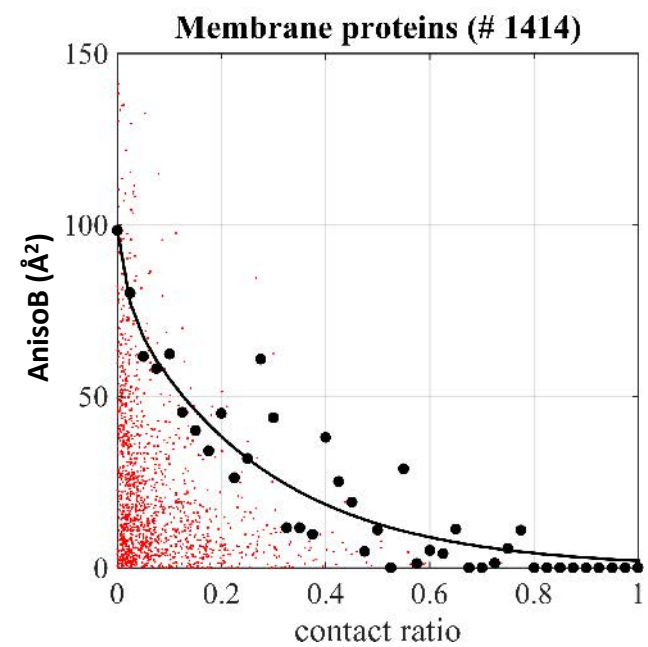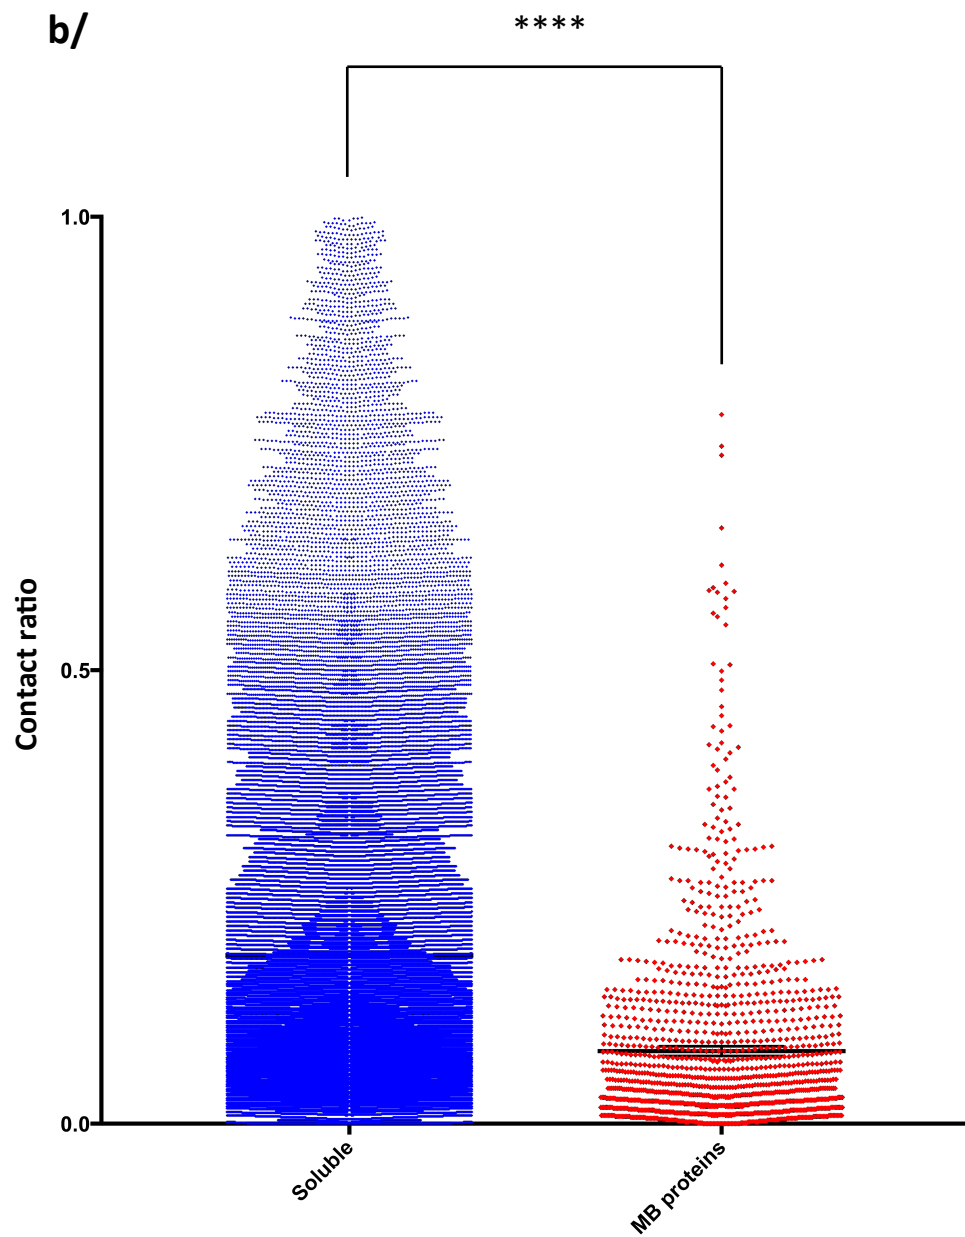

Figure S3

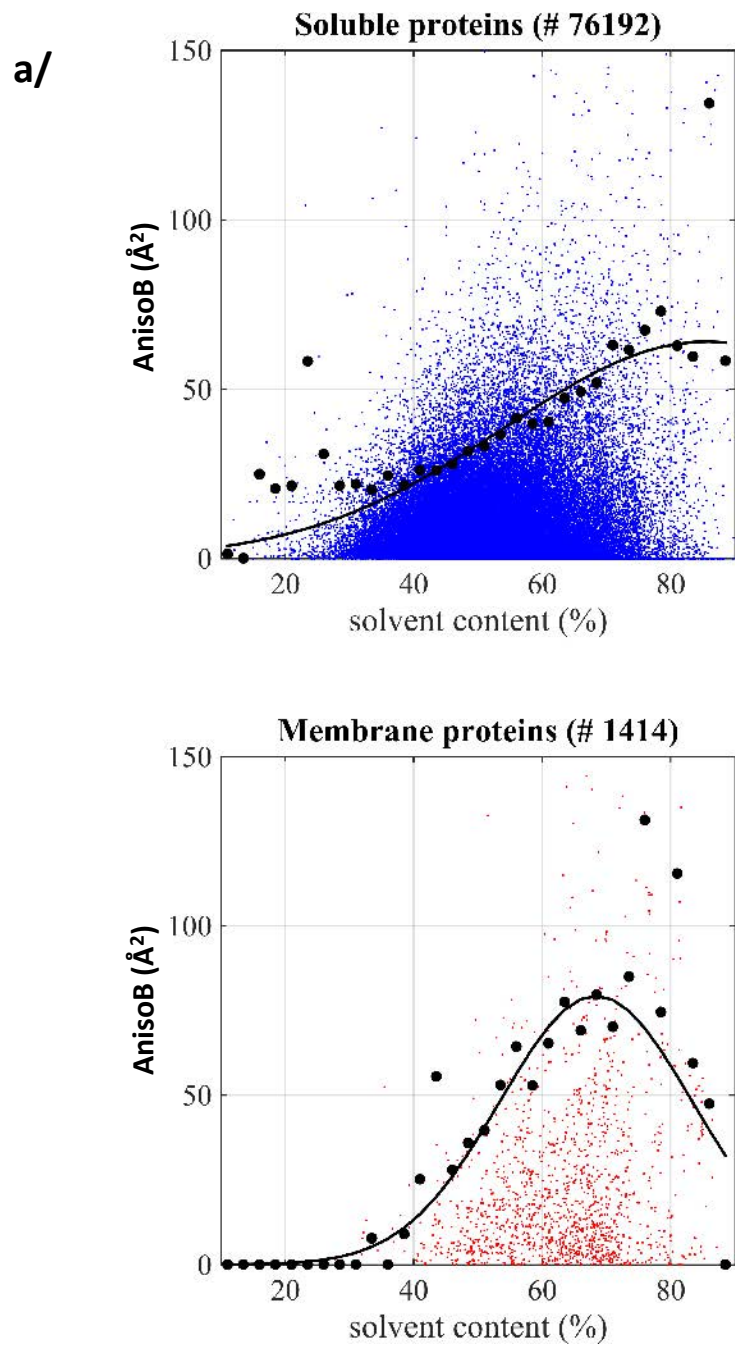

b/

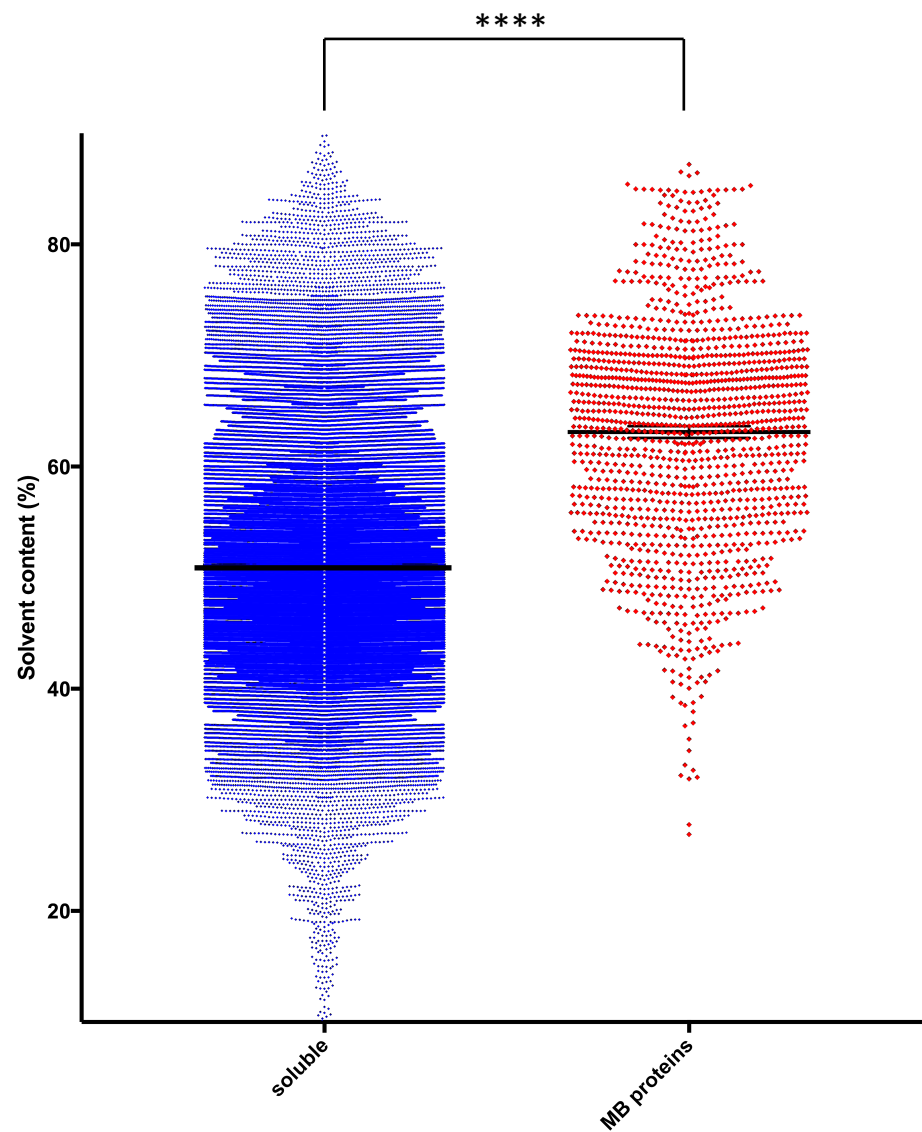

Figure S4

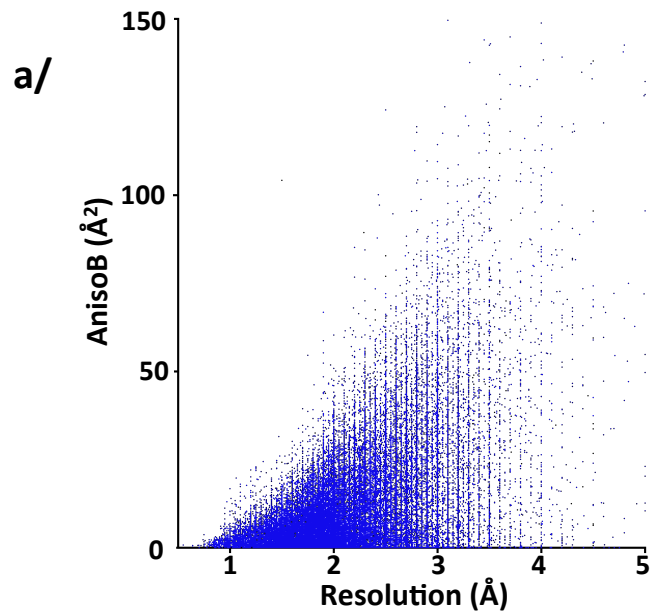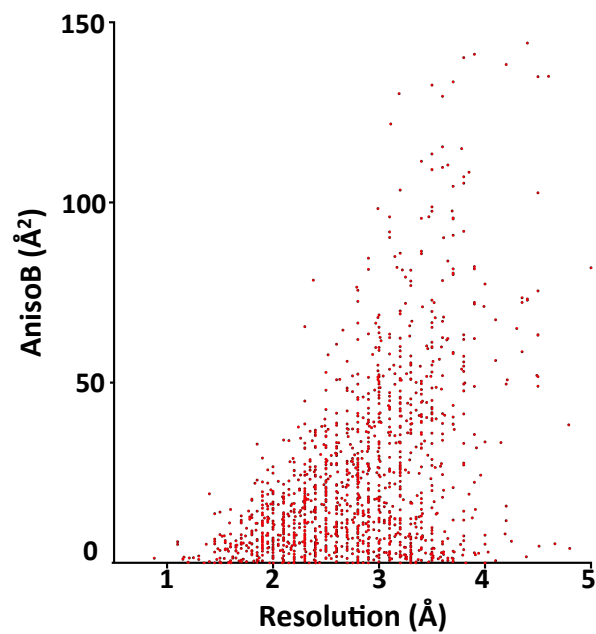

b/

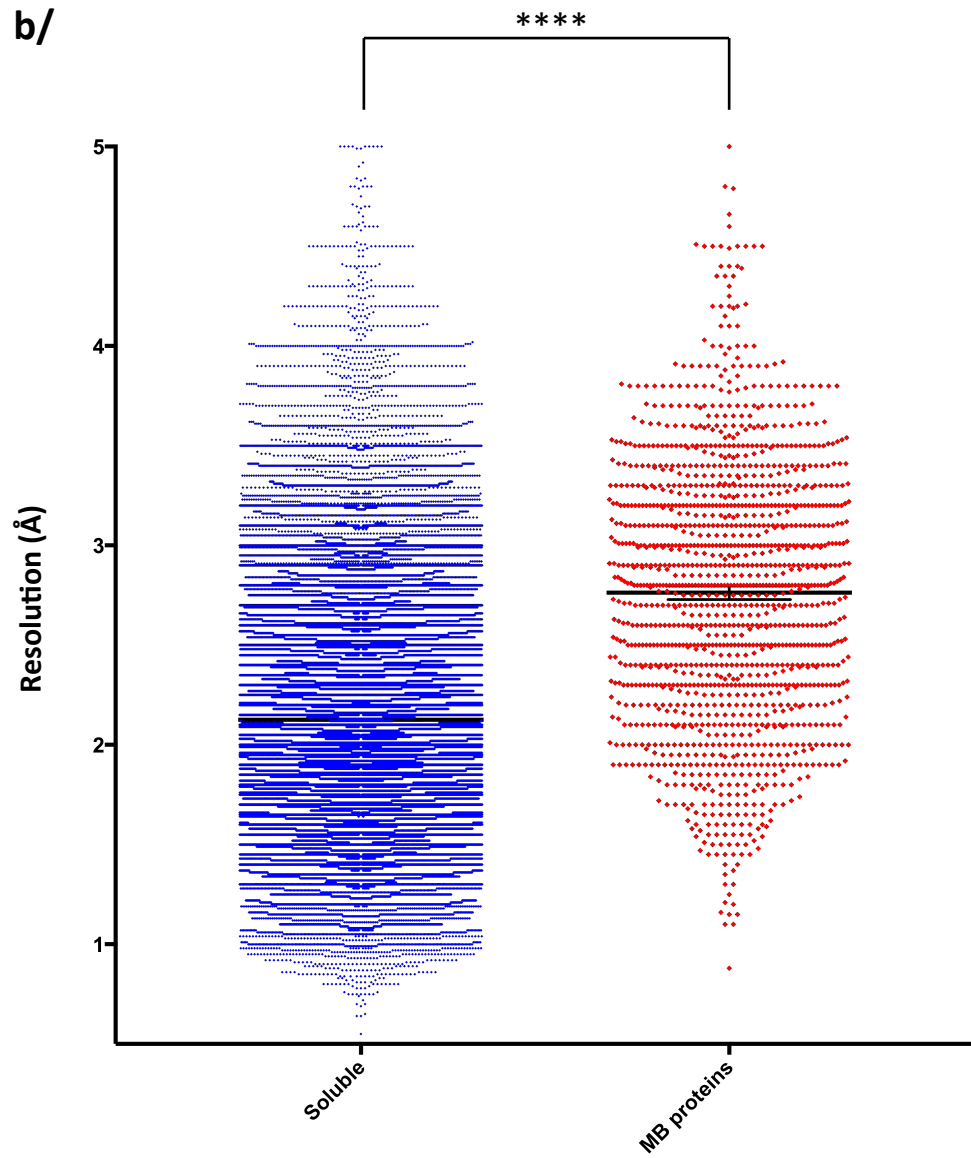



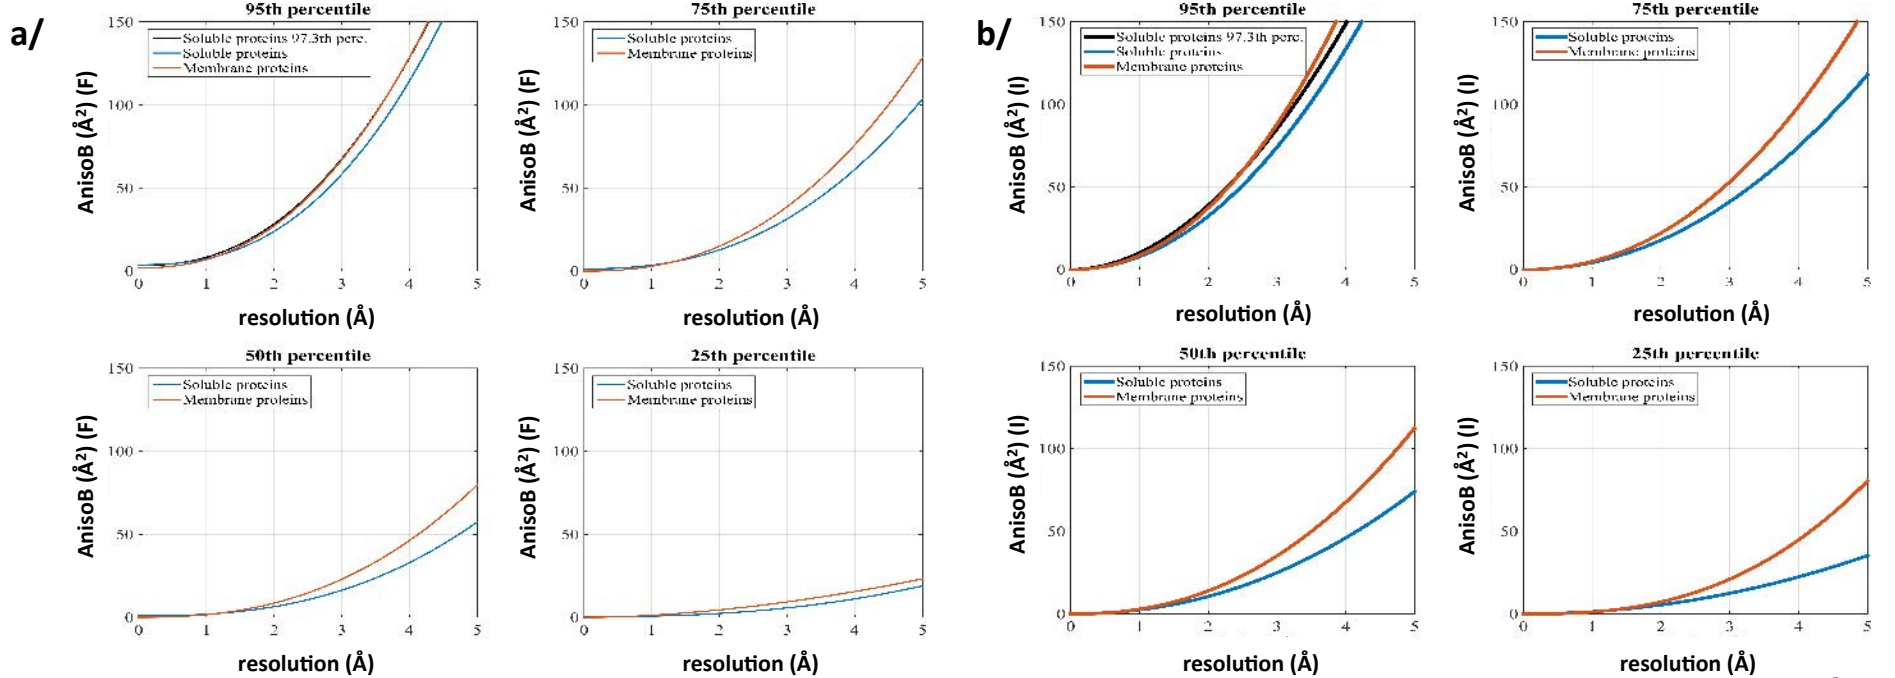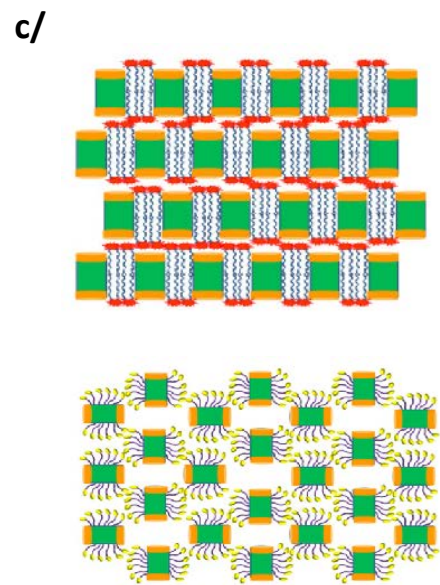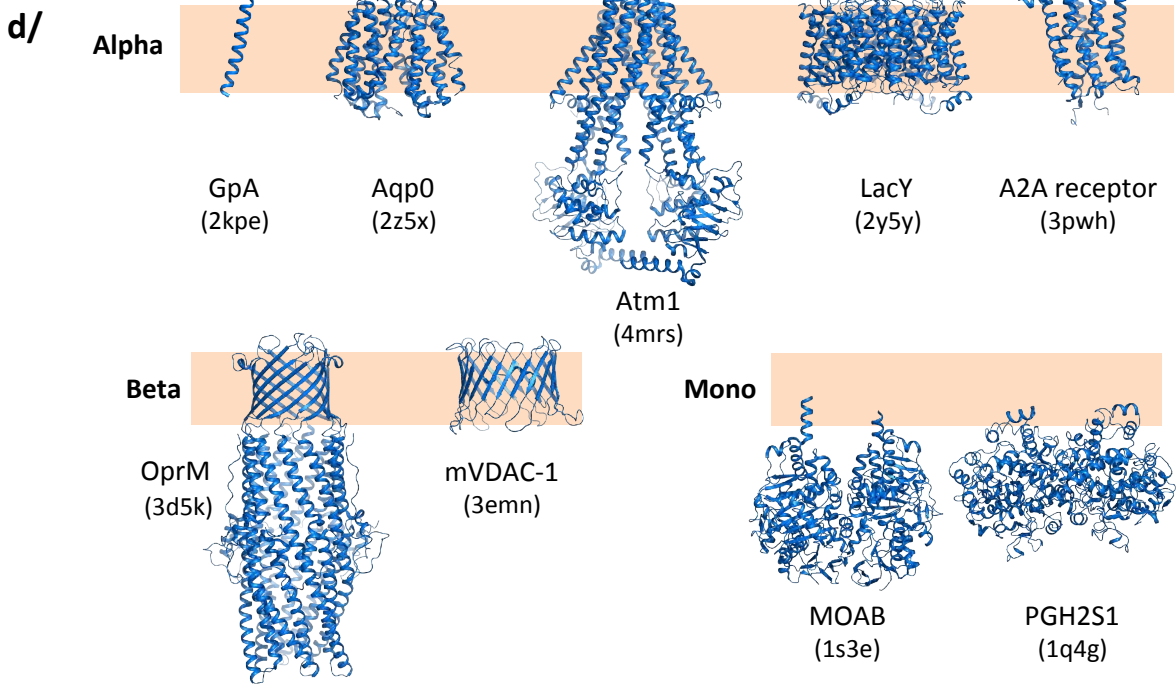

Fig. S6

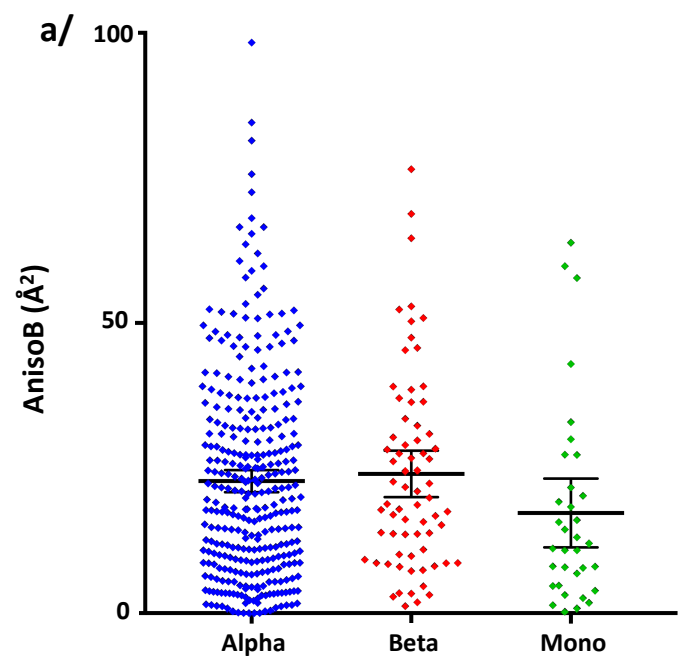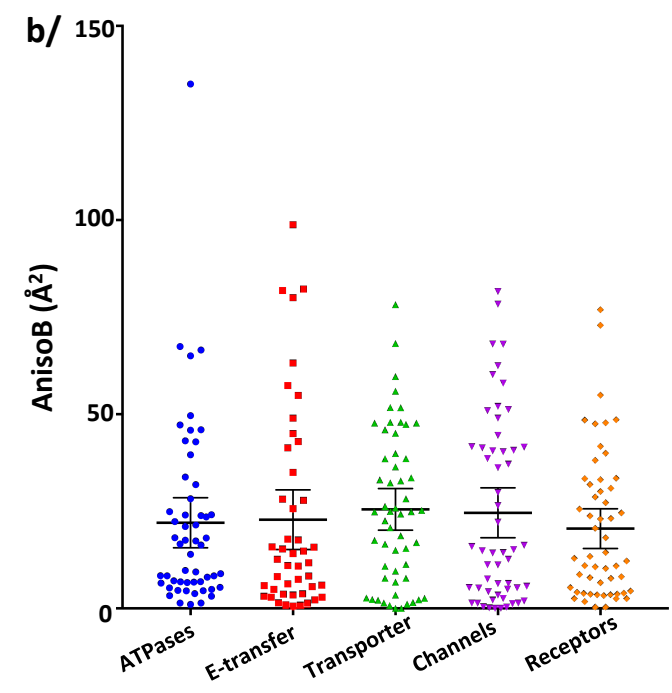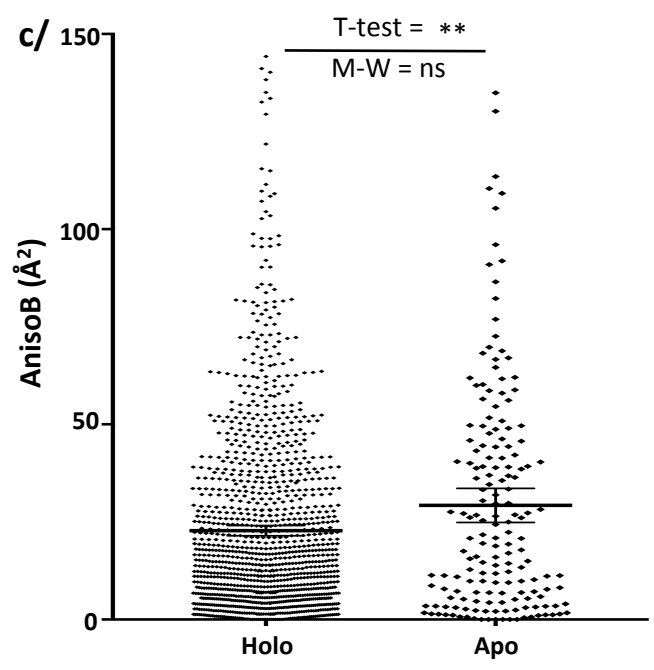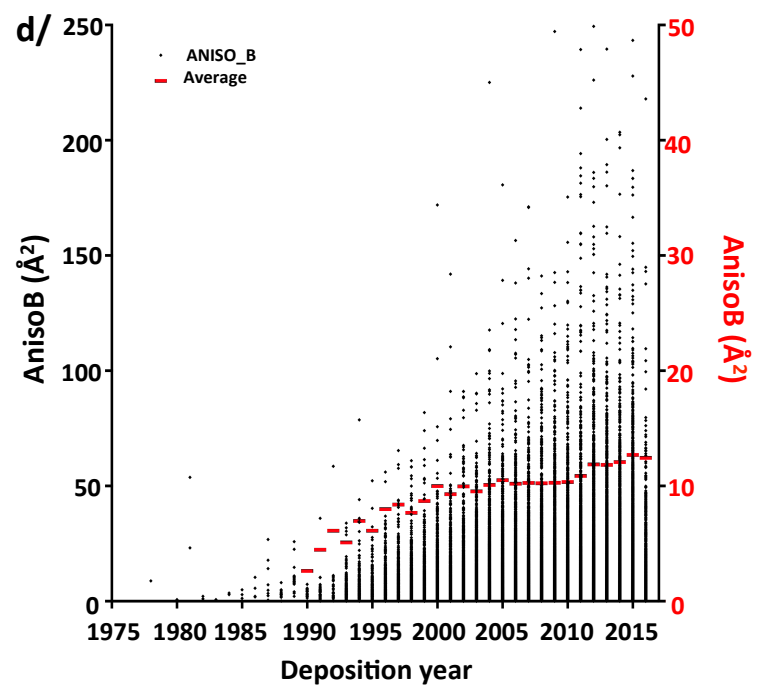

Table S1: General statistics

|                                |                         | Resolution (Å)           |        | Ratio1                      |        | Solvent content (%)      |        | Anisotropy (Å <sup>2</sup> ) |        |
|--------------------------------|-------------------------|--------------------------|--------|-----------------------------|--------|--------------------------|--------|------------------------------|--------|
|                                | Number of entries       | Mean                     | Median | Mean                        | Median | Mean                     | Median | Mean                         | Median |
| Soluble proteins               | 76192 structure factors | 2.126<br>(2.122 – 2.13)  | 2.04   | 0.1855<br>(0.1844 – 0.1867) | 0.136  | 51.11<br>(51.04 – 51.18) | 50.16  | 10.72<br>(10.63 – 10.81)     | 6.39   |
|                                | 22985 intensities       |                          |        |                             |        |                          |        | 15.68<br>(15.57 – 15.79)     | 10.62  |
| Membrane proteins              | 1415 structure factors  | 2.763<br>(2.729 – 2.797) | 2.8    | 0.08<br>(0.075 – 0.085)     | 0.042  | 63.11<br>(62.58 – 63.65) | 64.22  | 23.53<br>(22.26 – 24.8)      | 15.15  |
|                                | 483 intensities         |                          |        |                             |        |                          |        | 34.43<br>(33.07 – 35.79)     | 25.83  |
| Membrane proteins in detergent | 1241                    | 2.79<br>(2.75 – 2.82)    | 2.8    | 0.078<br>(0.072 – 0.083)    | 0.037  | 64.19<br>(63.63 – 64.75) | 65.35  | 24.1<br>(22.69 – 25.52)      | 15.1   |
| Membrane proteins in LCP       | 173                     | 2.61<br>(2.53 – 2.69)    | 2.6    | 0.096<br>(0.081 – 0.111)    | 0.069  | 55.64<br>(54.45 – 56.82) | 55.83  | 19.53<br>(17.25 – 21.82)     | 15.46  |
| ALPHA                          | 1138                    | 2.83<br>(2.79 – 2.87)    | 2.9    | 0.075<br>(0.069 – 0.08)     | 0.036  | 63.88<br>(63.27 – 64.48) | 65.23  | 24.71<br>(25.68 – 26.02)     | 15.87  |
| BETA                           | 200                     | 2.79<br>(2.41 – 2.57)    | 2.5    | 0.12<br>(0.099 – 0.13)      | 0.074  | 60.42<br>(59.19 – 61.67) | 60.98  | 19.24<br>(16.82 – 21.66)     | 13.85  |
| MONO                           | 90                      | 2.54<br>(2.63 – 2.54)    | 2.4    | 0.062<br>(0.052 – 0.072)    | 0.048  | 58.56<br>(56.92 – 60.21) | 59.62  | 16.38<br>(12.89 – 19.87)     | 12.35  |
| Transporters                   | 272                     | 2.99<br>(2.92 – 3.07)    | 3      | 0.049<br>(0.041 – 0.058)    | 0.025  | 65.04<br>(63.8 – 66.27)  | 67.3   | 31.46<br>(27.94 – 34.97)     | 24.36  |
| Channels                       | 225                     | 2.78<br>(2.68 – 2.87)    | 2.94   | 0.11<br>(0.09 – 0.13)       | 0.038  | 66.25<br>(65.25 – 68.05) | 67.87  | 24.65<br>(21.22 – 28.09)     | 14.6   |
| Receptors                      | 99                      | 2.84<br>(2.74 – 2.93)    | 2.8    | 0.068<br>(0.055 – 0.081)    | 0.058  | 60.96<br>(59.01 – 62.9)  | 58.92  | 21.13<br>(17.4 – 24.86)      | 16.48  |
| ATPases                        | 54                      | 2.99<br>(2.82 – 3.17)    | 2.95   | 0.042<br>(0.026 – 0.057)    | 0.024  | 63.43<br>(60.75 – 66.11) | 64.86  | 22.06<br>(15.6 – 28.51)      | 16.45  |
| Electron-transfer              | 46                      | 2.87<br>(2.64 – 3.1)     | 2.93   | 0.032<br>(0.017 – 0.048)    | 0.019  | 67.47<br>(65.3 – 69.65)  | 68.16  | 22.84<br>(15.15 – 30.52)     | 12.19  |

The number in parenthesis represent the 95% confidence interval of the mean.

**Table S2:** List of proteins crystallized both in detergent and LCP.

|                                                              | Crystallization in detergent |                          | Crystallization in LCP                                                                                                              |                          |
|--------------------------------------------------------------|------------------------------|--------------------------|-------------------------------------------------------------------------------------------------------------------------------------|--------------------------|
| Protein name                                                 | PDB entry                    | AnisoB (Å <sup>2</sup> ) | PDB entry                                                                                                                           | AnisoB (Å <sup>2</sup> ) |
| A2A adenosine receptor                                       | <b>2YDV</b>                  | 8.677                    | <b>3EML</b><br><b>4EIY</b><br><b>3QAK</b>                                                                                           | 0.346                    |
|                                                              | <b>2YDO</b>                  | 12.22                    |                                                                                                                                     | 2.476                    |
|                                                              | <b>4UHR</b>                  | 11.333                   |                                                                                                                                     | 6.627                    |
|                                                              | <b>3VG9</b>                  | 48.519                   |                                                                                                                                     |                          |
|                                                              | <b>4UG2</b>                  | 10.018                   |                                                                                                                                     |                          |
|                                                              | <b>3VGA</b>                  | 35.389                   |                                                                                                                                     |                          |
| AlgE alginate export protein                                 | <b>4AZL</b>                  | 17.505                   | <b>4AFK</b><br><b>4XNL</b><br><b>4XNK</b><br><b>4B61</b>                                                                            | 5.878                    |
|                                                              | <b>3RBH</b>                  | 27.378                   |                                                                                                                                     | 27.483                   |
|                                                              | <b>4TQU</b>                  | 29.299                   |                                                                                                                                     | 26.597                   |
|                                                              | <b>4TQV</b>                  | 134.91                   |                                                                                                                                     | 19.264                   |
| apo BtuB cobalamin transporter                               | <b>3M8B</b>                  | 0.11                     | <b>2GUF</b>                                                                                                                         | 25.8                     |
|                                                              | <b>3M8D</b>                  | 0.13                     |                                                                                                                                     |                          |
|                                                              | <b>2GSK</b>                  | 18.343                   |                                                                                                                                     |                          |
|                                                              | <b>2YSU</b>                  | 40.021                   |                                                                                                                                     |                          |
| Bacterial homologue of ASBT (ASBTNM) with bound taurocholate | <b>3ZUX</b>                  | 5.056                    | <b>4N7W</b><br><b>4N7X</b>                                                                                                          | 14.94                    |
|                                                              | <b>3ZUY</b>                  | 0                        |                                                                                                                                     | 20.815                   |
| Bacteriorhodopsin (BR)                                       | <b>3T45</b>                  | 6.384                    | <b>3NSB</b>                                                                                                                         | 12.097                   |
|                                                              |                              |                          | <b>4FPD</b>                                                                                                                         | 13.463                   |
|                                                              |                              |                          | <b>4X32</b>                                                                                                                         | 3.924                    |
|                                                              |                              |                          | <b>3NS0</b>                                                                                                                         | 12.746                   |
|                                                              |                              |                          | <b>4X31</b>                                                                                                                         | 0.614                    |
| β2 adrenergic receptor                                       | <b>3KJ6</b>                  | 26.647                   | <b>2RH1</b><br><b>3D4S</b><br><b>3PDS</b><br><b>4GBR</b><br><b>3NY8</b><br><b>3NY9</b><br><b>3SN6</b><br><b>3NYA</b><br><b>3P0G</b> | 20.474                   |
|                                                              | <b>2R4R</b>                  | 39.25                    |                                                                                                                                     | 28.681                   |
|                                                              | <b>2R4S</b>                  | 31.907                   |                                                                                                                                     | 41.713                   |
|                                                              |                              |                          |                                                                                                                                     | 71.171                   |
|                                                              |                              |                          |                                                                                                                                     | 30.945                   |
|                                                              |                              |                          |                                                                                                                                     | 28.964                   |
|                                                              |                              |                          |                                                                                                                                     | 1.636                    |
|                                                              |                              |                          |                                                                                                                                     | 33.284                   |
|                                                              |                              |                          |                                                                                                                                     | 72.903                   |
|                                                              |                              |                          |                                                                                                                                     |                          |
| Cytochrome C Oxidase aa3                                     | <b>3HB3</b>                  | 10.872                   | <b>2YEV</b>                                                                                                                         | 14.112                   |
|                                                              | <b>3EHB</b>                  | 11.017                   |                                                                                                                                     |                          |
|                                                              | <b>3X2Q</b>                  | 14.736                   |                                                                                                                                     |                          |
|                                                              | <b>2GSM</b>                  | 5.872                    |                                                                                                                                     |                          |
|                                                              | <b>3MK7</b>                  | 3.132                    |                                                                                                                                     |                          |
| FraC eukaryotic pore-forming toxin from sea anemone          | <b>4TSL</b>                  | 4.517                    | <b>4TSY</b>                                                                                                                         | 54.846                   |
|                                                              | <b>3VWI</b>                  | 6.88                     |                                                                                                                                     |                          |
|                                                              | <b>3W9P</b>                  | 9.453                    |                                                                                                                                     |                          |
|                                                              | <b>4TSN</b>                  | 3.863                    |                                                                                                                                     |                          |
|                                                              | <b>4TSO</b>                  | 17.297                   |                                                                                                                                     |                          |
|                                                              | <b>4TSQ</b>                  | 0.03                     |                                                                                                                                     |                          |

|                                                                 |             |        |             |        |
|-----------------------------------------------------------------|-------------|--------|-------------|--------|
|                                                                 | <b>4TSP</b> | 5.41   |             |        |
|                                                                 | <b>3LIM</b> | 8.863  |             |        |
| M2 proton channel (AM2)                                         | <b>3C9J</b> | 15.278 | <b>4QK7</b> | 5.13   |
|                                                                 | <b>3LBW</b> | 3.422  | <b>4QKC</b> | 5.86   |
|                                                                 | <b>3BKD</b> | 16.197 |             |        |
| MgtE Mg <sup>2+</sup> Transporter                               | <b>2YVY</b> | 15.728 | <b>4U9N</b> | 11.824 |
|                                                                 | <b>2YVZ</b> | 62.254 | <b>4U9L</b> | 11.204 |
|                                                                 | <b>2YVX</b> | 27.04  | <b>4WIB</b> | 25.899 |
|                                                                 | <b>2ZY9</b> | 57.848 |             |        |
| NarK nitrate/nitrite exchanger                                  | <b>4JR9</b> | 7.759  | <b>4U4W</b> | 35.519 |
|                                                                 | <b>4JRE</b> | 9.593  | <b>4U4V</b> | 28.219 |
|                                                                 |             |        | <b>4U4T</b> | 15.38  |
| NTS1 neurotensin receptor in complex with neurotensin           | <b>4BUO</b> | 28.104 | <b>4XES</b> | 31.809 |
|                                                                 | <b>3ZEV</b> | 28.75  | <b>4XEE</b> | 17.772 |
|                                                                 | <b>4BV0</b> | 25.37  | <b>4GRV</b> | 16.476 |
|                                                                 | <b>4BWB</b> | 56.492 |             |        |
| PepTSo Oligopeptide-proton symporter (POT family)               | <b>4TPJ</b> | 1.667  | <b>4UVM</b> | 29.504 |
|                                                                 | <b>4TPH</b> | 2.599  |             |        |
|                                                                 | <b>4TPG</b> | 2.262  |             |        |
|                                                                 | <b>2XUT</b> | 8.682  |             |        |
| PepTSt Oligopeptide-proton symporter (POT family)               | <b>4APS</b> | 4.774  | <b>4XNJ</b> | 17.906 |
|                                                                 |             |        | <b>4XNI</b> | 14.703 |
| Photosynthetic Reaction Center                                  | <b>4N7L</b> | 3.077  | <b>2J8C</b> | 1.424  |
|                                                                 | <b>4N7K</b> | 5.987  | <b>2J8D</b> | 7.643  |
|                                                                 |             |        | <b>2WJM</b> | 5.821  |
|                                                                 |             |        | <b>2WJN</b> | 0.588  |
|                                                                 |             |        | <b>4CAS</b> | 8.182  |
| RPE65 visual cycle retinoid isomerase                           | <b>3FSN</b> | 13.538 | <b>4F3A</b> | 1.774  |
|                                                                 | <b>4F30</b> | 21.878 | <b>4F2Z</b> | 59.784 |
|                                                                 | <b>4F3D</b> | 7.892  |             |        |
| Stearoyl-coenzyme A desaturase (SCD1) in complex with substrate | <b>4ZYO</b> | 25.788 | <b>4YMK</b> | 16.714 |
| Translocator protein (TSPO)                                     | <b>4RYJ</b> | 56.148 | <b>4UC1</b> | 8.056  |
|                                                                 |             |        | <b>4UC2</b> | 19.401 |
|                                                                 |             |        | <b>4UC3</b> | 12.382 |
|                                                                 |             |        | <b>4RYN</b> | 10.555 |
|                                                                 |             |        | <b>4RYQ</b> | 6.76   |
|                                                                 |             |        | <b>4RYM</b> | 52.38  |
|                                                                 |             |        | <b>4RYI</b> | 23.376 |
| Zn <sup>2+</sup> -transporting four-helix bundle                | <b>4P6J</b> | 0.461  | <b>4P6K</b> | 8.604  |
|                                                                 | <b>4P6L</b> | 0      |             |        |

**Table S3:** Membrane proteins for which structures are available, Apo or in complex with a ligand, with more than two entries in each category.

| Protein name                                                | Apo         |                           | Holo        |                           |
|-------------------------------------------------------------|-------------|---------------------------|-------------|---------------------------|
|                                                             | PDB entry   | AnisoB ( $\text{\AA}^2$ ) | PDB entry   | AnisoB ( $\text{\AA}^2$ ) |
| AcrB, bacterial multi-drug efflux transporter               | <b>2HQC</b> | 1.112                     | <b>2RDD</b> | 33.109                    |
|                                                             | <b>2HQG</b> | 3.455                     | <b>4DX5</b> | 8.284                     |
|                                                             | <b>2HQF</b> | 12.778                    | <b>4DX7</b> | 20.154                    |
|                                                             | <b>2HQD</b> | 0.685                     | <b>2W1B</b> | 19.04                     |
|                                                             | <b>4CDI</b> | 0.462                     | <b>3AOC</b> | 10.979                    |
|                                                             | <b>3AOA</b> | 6.957                     | <b>2HRT</b> | 5.384                     |
|                                                             | <b>2DHH</b> | 45.89                     | <b>2GIF</b> | 14.027                    |
|                                                             |             |                           | <b>4U96</b> | 7.434                     |
|                                                             |             |                           | <b>4DX6</b> | 9.1                       |
|                                                             |             |                           | <b>2J8S</b> | 24.021                    |
|                                                             |             |                           | <b>4U95</b> | 10.926                    |
|                                                             |             |                           | <b>4U8Y</b> | 11.016                    |
|                                                             |             |                           | <b>4U8V</b> | 14.985                    |
|                                                             |             |                           | <b>4C48</b> | 0                         |
|                                                             |             |                           | <b>2DRD</b> | 29.286                    |
|                                                             |             |                           | <b>3AOD</b> | 6.593                     |
|                                                             |             | <b>2F1M</b>               | 21.537      |                           |
|                                                             |             | <b>3W9H</b>               | 6.745       |                           |
|                                                             |             | <b>3AOB</b>               | 12.665      |                           |
| BamB, component of the Bam $\beta$ -barrel assembly machine | <b>3Q54</b> | 14.964                    | <b>4XGA</b> | 7.826                     |
|                                                             | <b>3PRW</b> | 3.439                     | <b>3Q7N</b> | 14.372                    |
|                                                             | <b>2HY3</b> | 3.377                     | <b>3Q7M</b> | 3.302                     |
|                                                             | <b>3Q7O</b> | 0                         | <b>3P1L</b> | 7.98                      |
| $\beta$ 2 adrenergic receptor                               | <b>2R4R</b> | 39.25                     | <b>2RH1</b> | 20.474                    |
|                                                             | <b>2R4S</b> | 31.907                    | <b>4GBR</b> | 71.171                    |
|                                                             |             |                           | <b>3PDS</b> | 41.713                    |
|                                                             |             |                           | <b>3NY8</b> | 30.945                    |
|                                                             |             |                           | <b>3NY9</b> | 28.964                    |
|                                                             |             |                           | <b>3NYA</b> | 33.284                    |
|                                                             |             |                           | <b>3D4S</b> | 28.681                    |
|                                                             |             |                           | <b>3SN6</b> | 1.636                     |
|                                                             |             |                           | <b>3P0G</b> | 72.903                    |
|                                                             |             | <b>3KJ6</b>               | 26.647      |                           |
| CusA, metal-ion efflux pump                                 | <b>3NE5</b> | 17.835                    | <b>3OPO</b> | 108.412                   |
|                                                             | <b>3OOC</b> | 86.491                    | <b>3OW7</b> | 114.948                   |
|                                                             | <b>3K07</b> | 16.984                    |             |                           |
| CusC, heavy metal discharge outer membrane protein          | <b>4K7K</b> | 13.891                    | <b>4K7R</b> | 10.675                    |
|                                                             | <b>4K34</b> | 9.828                     | <b>3PIK</b> | 9.999                     |
| DgkA, diacylglycerol                                        | <b>3ZE5</b> | 11.112                    | <b>3ZE3</b> | 5.192                     |
|                                                             | <b>3ZE4</b> | 40.456                    | <b>4UXZ</b> | 4.733                     |

|                                                      |             |        |             |        |
|------------------------------------------------------|-------------|--------|-------------|--------|
| kinase (DAGK)                                        |             |        | <b>4UYO</b> | 16.36  |
|                                                      |             |        | <b>4UXX</b> | 21.676 |
|                                                      |             |        | <b>4UXW</b> | 10.549 |
| FadI, long-chain fatty acid transporter              | <b>2R88</b> | 21.716 | <b>3DWO</b> | 5.995  |
|                                                      | <b>2R89</b> | 36.168 | <b>3PGS</b> | 6.187  |
|                                                      |             |        | <b>3PGU</b> | 6.78   |
|                                                      |             |        | <b>3PGR</b> | 32.298 |
|                                                      |             |        | <b>3PF1</b> | 16.135 |
|                                                      |             |        | <b>3DWN</b> | 22.64  |
|                                                      |             |        | <b>2R4N</b> | 25.179 |
|                                                      |             |        | <b>2R4O</b> | 38.693 |
|                                                      |             |        | <b>2R4P</b> | 16.967 |
|                                                      |             |        | <b>2R4L</b> | 30.545 |
| GlpG, rhomboid-family intramembrane protease         | <b>2NRF</b> | 38.781 | <b>4QO2</b> | 11.812 |
|                                                      | <b>3ODJ</b> | 15.986 | <b>4QNZ</b> | 7.445  |
|                                                      | <b>5F5D</b> | 26.075 | <b>4QO0</b> | 11.409 |
|                                                      |             |        | <b>3UBB</b> | 18.036 |
|                                                      |             |        | <b>5F5K</b> | 35.322 |
|                                                      |             |        | <b>5F5B</b> | 19.882 |
|                                                      |             |        | <b>5F5J</b> | 24.204 |
|                                                      |             |        | <b>3B44</b> | 5.611  |
|                                                      |             |        | <b>3B45</b> | 5.662  |
|                                                      |             |        | <b>2IC8</b> | 13.493 |
|                                                      |             |        | <b>2XTU</b> | 4.349  |
|                                                      |             |        | <b>2O7L</b> | 17.439 |
|                                                      |             |        | <b>2XOV</b> | 4.385  |
|                                                      |             |        | <b>2XOW</b> | 18.331 |
|                                                      |             |        | <b>3TXT</b> | 44.921 |
|                                                      |             |        | <b>2IRV</b> | 2.07   |
|                                                      |             |        | <b>2XTV</b> | 3.989  |
|                                                      |             |        | <b>2NR9</b> | 5.519  |
| H <sup>+</sup> /Cl <sup>-</sup> Exchange Transporter | <b>4FG6</b> | 61.648 | <b>2EZ0</b> | 39.96  |
|                                                      | <b>2EXW</b> | 47.669 | <b>4FTP</b> | 50.685 |
|                                                      | <b>2EXY</b> | 46.241 | <b>3NMO</b> | 11.16  |
|                                                      |             |        | <b>4MQX</b> | 72.237 |
|                                                      |             |        | <b>4ENE</b> | 32.318 |
| Heterodimeric ABC exporter TM287-TM288               | <b>4Q7M</b> | 5.56   | <b>3QF4</b> | 81.445 |
|                                                      | <b>4Q7K</b> | 13.359 | <b>4Q4A</b> | 60.68  |
|                                                      | <b>4Q4H</b> | 2.125  | <b>4Q7L</b> | 2.492  |
| KcsA, Potassium channel H <sup>+</sup> gated         | <b>3EFD</b> | 1.716  | <b>2ITD</b> | 5.428  |
|                                                      | <b>3EFF</b> | 14.359 | <b>3STL</b> | 14.732 |
|                                                      | <b>3PJS</b> | 27.158 | <b>2W0F</b> | 7.076  |
|                                                      |             |        | <b>4UUJ</b> | 2.231  |

|                                                                   |                                                          |                                    |                                                                                                                                                                                                                                                             |                                                                                                                                                                    |
|-------------------------------------------------------------------|----------------------------------------------------------|------------------------------------|-------------------------------------------------------------------------------------------------------------------------------------------------------------------------------------------------------------------------------------------------------------|--------------------------------------------------------------------------------------------------------------------------------------------------------------------|
|                                                                   |                                                          |                                    | <b>2JK5</b><br><b>2BOC</b><br><b>2BOB</b><br><b>2NLJ</b><br><b>3GB7</b><br><b>3IGA</b><br><b>3OR6</b><br><b>3OR7</b><br><b>3HPL</b><br><b>3FB6</b><br><b>3F7Y</b><br><b>3F5W</b><br><b>3F7V</b><br><b>3FB5</b><br><b>3STZ</b><br><b>2ITC</b><br><b>3FB7</b> | 15.103<br>18.26<br>11.207<br>23.302<br>0.095<br>11.934<br>16.416<br>8.807<br>18.782<br>19.991<br>11.341<br>10.761<br>10.964<br>17.709<br>19.731<br>14.718<br>0.813 |
| NTS1,<br>neurotensin<br>receptor                                  | <b>4BV0</b><br><b>4BWB</b>                               | 25.37<br>56.492                    | <b>4XEE</b><br><b>4XES</b><br><b>4GRV</b><br><b>4BUO</b><br><b>3ZEV</b>                                                                                                                                                                                     | 17.772<br>31.809<br>16.476<br>28.104<br>28.75                                                                                                                      |
| OmpF, outer<br>membrane<br>protein F                              | <b>2ZLD</b><br><b>3K1B</b><br><b>4D5U</b><br><b>3K19</b> | 68.801<br>1.694<br>69.748<br>2.144 | <b>3FYX</b><br><b>3O0E</b><br><b>2ZFG</b><br><b>3HW9</b><br><b>3NSG</b><br><b>3HWB</b>                                                                                                                                                                      | 9.673<br>62.567<br>11.059<br>7.401<br>76.49<br>50.273                                                                                                              |
| ELIC,<br>Prokaryotic<br>pentameric<br>ligand-gated<br>ion channel | <b>2VL0</b><br><b>4TWH</b>                               | 36.962<br>67.004                   | <b>4TWD</b><br><b>3RQW</b><br><b>4TWF</b><br><b>3RQU</b><br><b>3ZKR</b>                                                                                                                                                                                     | 57.217<br>37.942<br>71.84<br>43.626<br>62.23                                                                                                                       |
| GLIC,<br>Prokaryotic<br>pentameric<br>ligand-gated<br>ion channel | <b>3EHZ</b><br><b>3EIO</b><br><b>4NPQ</b>                | 91.848<br>109.179<br>58.614        | <b>4IL9</b><br><b>4ILA</b><br><b>4HFI</b><br><b>4ILB</b><br><b>4ILC</b><br><b>4IL4</b><br><b>3IGQ</b><br><b>4QH1</b><br><b>4QH5</b><br><b>3P4W</b><br><b>4F8H</b><br><b>3EAM</b><br><b>3P50</b>                                                             | 33.678<br>61.213<br>36.234<br>35.295<br>53.295<br>81.197<br>6.434<br>85.773<br>58.982<br>44.481<br>68.071<br>10.055<br>50.889                                      |



|           |             |       |             |         |
|-----------|-------------|-------|-------------|---------|
|           |             |       | <b>4NPP</b> | 50.097  |
|           |             |       | <b>2XQ9</b> | 103.447 |
|           |             |       | <b>2XQ4</b> | 129.462 |
|           |             |       | <b>2XQ3</b> | 109.097 |
|           |             |       | <b>2XQ7</b> | 111.443 |
|           |             |       | <b>2XQA</b> | 104.485 |
|           |             |       | <b>2XQ8</b> | 109.741 |
| V1-ATPase | <b>3GQB</b> | 1.378 | <b>3W3A</b> | 22.354  |
|           | <b>3A5D</b> | 3.992 | <b>3A5C</b> | 4.63    |
|           |             |       | <b>3V6I</b> | 5.432   |
|           |             |       | <b>3K5B</b> | 47.236  |
